# Supplementary material for: Examining Psychopathic Traits in Children Using the Child Psychopathy Scale – Revised
Source: Springer Nature journal article supplement (doi:10.1007/s10802-019-00591-w), 2019-10-22
Supplement: MOESM1 [file 17299636]

**ONLINE SUPPLEMENT**

The measurement model for the CPS-R was developed by first computing exploratory factor analyses (EFA) separately by informant. Items 2 (easily frustrated), 27 (dangerous things for fun) and 37 (irritated or mad over little things) were dropped because they were redundant with other items (produced zero in binomial tables warnings) in either mother or teacher ratings. Fit statistics and theory indicated most support for a five factor model for mother ratings and a four factor model for teacher ratings (see tables below). These factor models were interpreted by examining items on each factor, with items considered as factor indicators if the factor loading was significant, if the factor explained at least 10% of the item variance (i.e., loading .32 or above), if the factor loadings was approximately twice as large for one factor than for other factors, and if the item content was theoretically meaningful (Tabachnik & Fidell, 2012).

Based on these results, along with a goal to develop the same measurement model for both mother and teacher ratings, a four factor model was developed. The four factor model consisted of a prosocial empathy factor (PE), a grandiose-manipulative factor (GM), an emotionally volatile factor (EV), and an attention-planful factor (AP). Items representing these factors were drawn directly from the EFA except that the PE and EO factors were combined into one factor (PE) for mother ratings and items that loaded on a factor for one but not the other informant were included for both informants. Three items that loaded on different factors for mom versus teacher were dropped from the CFA: 5 (open and straightforward), 33 (talkative), and 42 (shy). Items that were not factor indicators were not used in the CFA.

*Summary of Model Fit for Exploratory Factor Analyses*

| factors | χ2 | df | *p* | RMSEA | CFI | TLI | Neg Res |
| --- | --- | --- | --- | --- | --- | --- | --- |
| Mother Ratings | |  |  |  |  |  |  |
| 1 | 2199.04 | 1274 | .0000 | .060 | .663 | .649 | 0 |
| 2 | 1698.79 | 1223 | .0000 | .044 | .826 | .812 | 0 |
| 3 | 1518.12 | 1173 | .0000 | .038 | .874 | .858 | 0 |
| 4 | 1326.20 | 1124 | .0000 | .030 | .926 | .913 | 0 |
| 5 | 1215.73 | 1076 | .0018 | .025 | .949 | .937 | 0 |
| 6 | 1125.88 | 1029 | .0185 | .021 | .965 | .954 | 1 |
| Teacher Ratings | |  |  |  |  |  |  |
| 1 | 1977.81 | 1274 | .0000 | .058 | .909 | .905 | 0 |
| 2 | 1600.56 | 1223 | .0000 | .044 | .951 | .947 | 0 |
| 3 | 1437.52 | 1173 | .0000 | .037 | .966 | .961 | 0 |
| 4 | 1317.20 | 1124 | .0001 | .032 | .975 | .970 | 0 |
| 5 | 1197.98 | 1076 | .0054 | .026 | .984 | .980 | 0 |
| 6 | 1116.95 | 1029 | .0287 | .023 | .989 | .985 | 0 |

**Note:** RMSEA = root mean square error of approximation, CFI = comparative fit index, TLI = Tucker-Lewis index, Neg Res = number of items with negative residual variance.

*Factor loadings from the five factor model of mother ratings from the exploratory factor analysis*

| *Item* |  | *EO* | *GM* | *PE* | *AP* | *EV* |
| --- | --- | --- | --- | --- | --- | --- |
| 33 | Talkative | **0.846*** | 0.028 | -0.324* | -0.251 | -0.021 |
| 13 | Shows feelings openly | **0.804*** | -0.148 | 0.02 | 0.152 | 0.01 |
| 5 | Open and straightforward | **0.705*** | -0.23 | 0.132 | 0.055 | 0.052 |
| 42 | Shy | **-0.632*** | -0.095 | 0.254* | 0.038 | 0.028 |
| 15 | Protective of others | **0.550*** | 0.006 | 0.233 | 0.029 | -0.117 |
| 1 | Warm and kind | **0.380*** | -0.052 | 0.337 | -0.066 | -0.329 |
| 52 | Good liar | -0.164 | **0.834*** | -0.051 | 0.039 | 0.03 |
| 11 | Tells lie if he/she can | -0.053 | **0.779*** | -0.074 | -0.101 | 0.019 |
| 47 | Tells stories to look good | 0.104 | **0.727*** | -0.116 | 0.220* | -0.054 |
| 8 | Acts charming | 0.293 | **0.698*** | 0.048 | 0.163 | -0.159 |
| 40 | Plays up to others | 0.126 | **0.681*** | 0.052 | 0.138 | -0.008 |
| 53 | Shows off | 0.329 | **0.677*** | 0.096 | -0.047 | -0.001 |
| 14 | Tries to get away with things | 0.209 | **0.672*** | -0.045 | -0.141 | 0.161 |
| 44 | Smooth talker | 0.224 | **0.563*** | 0.08 | 0.007 | -0.159 |
| 30 | Usually believe his/her lies | -0.092 | **0.455*** | -0.042 | 0.166 | -0.036 |
| 34 | Feelings seem fake | -0.127 | **0.380*** | -0.159 | 0.009 | 0.047 |
| 26 | Feels guilty after doing wrong | -0.194 | -0.022 | **1.034*** | 0.076 | 0.08 |
| 35 | Bothers when does wrong | -0.151 | -0.182 | **0.933*** | -0.051 | 0.193 |
| 36 | Sees how others feel | -0.024 | 0.189 | **0.733*** | 0.200* | -0.05 |
| 50 | Tries not to hurt feelings | 0.043 | 0.001 | **0.482*** | 0.013 | -0.143 |
| 3 | Makes close friends | 0.064 | 0.143 | **0.481*** | 0.252* | -0.08 |
| 17 | gives, lends, shares | 0.115 | 0.114 | **0.427*** | 0.063 | -0.266 |
| 46 | Concentrates well | -0.11 | -0.105 | -0.026 | **0.822*** | 0.087 |
| 19 | Sticks with work | 0.081 | -0.286* | 0.034 | **0.688*** | -0.005 |
| 25 | Plans ahead | 0.191 | 0.025 | 0.203 | **0.679*** | 0.047 |
| 22 | Uses head before doing or saying | 0.038 | -0.03 | 0.059 | **0.625*** | -0.267* |
| 39 | Sets goals | 0.153 | 0.008 | 0.222 | **0.524*** | -0.074 |
| 9 | Thinks about life goals | 0.256 | -0.08 | -0.021 | **0.440*** | 0.14 |
| 54 | Feelings change quickly and often | 0.074 | 0.013 | 0.163 | -0.088 | **0.954*** |
| 48 | Quick temper | 0.174 | 0.046 | -0.016 | 0.074 | **0.887*** |
| 10 | Moods unpredictable | -0.065 | 0.046 | -0.077 | -0.071 | **0.745*** |
| 21 | Feelings come and go quickly | 0.038 | -0.046 | -0.006 | -0.167 | **0.665*** |
| 12 | Easily bored | 0.264 | 0.216 | -0.092 | -0.164 | **0.254*** |
| *Items not used as factor indicators* | |  |  |  |  |  |
| 4 | Blames others | -0.087 | 0.436* | -0.032 | -0.045 | 0.293* |
| 6 | Center of attention | 0.516* | 0.562* | 0.042 | -0.144 | 0.11 |
| 7 | Stays away from scary | 0.292* | -0.122 | -0.04 | 0.015 | -0.002 |
| 16 | Takes advantage of others | 0.009 | 0.434* | -0.139 | 0.357* | 0.199 |
| 18 | Considerate and thoughtful | 0.221 | 0.029 | 0.578* | -0.037 | -0.373* |
| 20 | Mean to others | -0.07 | 0.022 | -0.510* | 0.408* | 0.490* |
| 23 | Hard time waiting | 0.19 | -0.023 | 0.023 | -0.732* | 0.490* |
| 24 | Pays back | 0.153 | -0.221* | 0.315* | 0.326* | -0.064 |
| 28 | Can be trusted | 0.32 | -0.456* | 0.313 | -0.006 | -0.207 |
| 29 | Reliable and dependable | 0.154 | -0.277* | 0.380* | 0.234* | -0.014 |
| 31 | Teases and picks on others | -0.055 | 0.220* | -0.196 | 0.393* | 0.434* |
| 32 | Needs things exciting | 0.251 | 0.437* | 0.039 | 0.068 | 0.19 |
| 38 | Regrets things | -0.001 | 0.303* | 0.732* | -0.025 | 0.394* |
| 41 | Feels unfairly blamed | -0.292* | 0.419* | 0.168 | -0.021 | 0.385* |
| 43 | Thinks about actions | -0.074 | 0.003 | 0.483* | 0.486* | -0.062 |
| 45 | Takes a lot and does not give | -0.068 | 0.264* | -0.499* | -0.023 | 0.237 |
| 49 | Feels things strongly | 0.397* | -0.03 | 0.039 | 0.181 | 0.618* |
| 51 | Breaks promises | -0.164 | 0.354* | -0.237 | -0.208* | 0.198 |
| 55 | Feelings intense | 0.498* | 0.029 | -0.034 | 0.013 | 0.739* |

*Notes*. Items in bold font were used as indicators of factors in subsequent analyses. EO = emotionally open. GM = grandiose-manipulative. PE = prosocial-empathy. AP = attentive-planful. EV = emotionally volatile.

* = *p <* .05

*Factor loadings from the five factor model of teacher ratings from the exploratory factor analysis*

| *Item* |  | *PE* | *GM* | *AP* | *EV* |
| --- | --- | --- | --- | --- | --- |
| 1 | Warm and kind | **0.970*** | 0.282* | -0.009 | -0.097 |
| 26 | Feels guilty after doing wrong | **0.862*** | 0.015 | 0.122 | -0.009 |
| 18 | Considerate and thoughtful | **0.861*** | 0.027 | 0.02 | -0.277* |
| 17 | gives, lends, shares | **0.796*** | 0.181 | 0.019 | -0.238 |
| 35 | Bothers when does wrong | **0.748*** | -0.158 | 0.158 | 0.208* |
| 15 | Protective of others | **0.711*** | 0.169 | 0.058 | 0.021 |
| 50 | Tries not to hurt feelings | **0.598*** | 0.003 | 0.085 | -0.036 |
| 36 | Sees how others feel | **0.553*** | -0.097 | 0.203 | 0.01 |
| 44 | Smooth talker | 0.067 | **0.845*** | 0.103 | 0.037 |
| 8 | Acts charming | 0.254 | **0.798*** | 0.003 | -0.084 |
| 53 | Shows off | 0.031 | **0.787*** | 0.046 | 0.214 |
| 33 | Talkative | -0.059 | **0.717*** | 0.328* | 0.117 |
| 6 | Center of attention | -0.214 | **0.709*** | 0.19 | 0.191 |
| 52 | Good liar | -0.385* | **0.684*** | -0.066 | -0.123 |
| 42 | Shy | 0.316* | **-0.657*** | -0.246 | 0.102 |
| 24 | Pays back | 0.066 | **-0.651*** | 0.217 | 0.118 |
| 14 | Tries to get away with things | -0.167 | **0.615*** | -0.149 | 0.171 |
| 47 | Tells stories to look good | -0.189 | **0.610*** | -0.083 | 0.038 |
| 40 | Plays up to others | -0.019 | **0.580*** | -0.159 | 0.08 |
| 32 | Needs things exciting | 0.153 | **0.536*** | -0.063 | 0.232 |
| 51 | Breaks promises | -0.074 | **0.519*** | -0.256 | 0.196 |
| 34 | Feelings seem fake | -0.14 | **0.516*** | -0.217 | -0.021 |
| 46 | Concentrates well | -0.379* | -0.349 | **0.874*** | -0.072 |
| 19 | Sticks with work | 0.007 | -0.218 | **0.802*** | 0.078 |
| 39 | Sets goals | 0.12 | -0.032 | **0.757*** | 0.032 |
| 25 | Plans ahead | 0.079 | 0.027 | **0.729*** | -0.084 |
| 5 | Open and straightforward | 0.133 | -0.048 | **0.577*** | 0.005 |
| 9 | Thinks about life goals | 0.032 | 0.027 | **0.446*** | -0.049 |
| 54 | Feelings change quickly and often | 0.006 | 0.06 | -0.129 | **0.879*** |
| 55 | Feelings intense | -0.021 | 0.127 | 0.206 | **0.850*** |
| 49 | Feels things strongly | 0.08 | -0.035 | 0.247 | **0.816*** |
| 10 | Moods unpredictable | -0.157 | -0.005 | -0.174 | **0.744*** |
| 48 | Quick temper | -0.374* | 0.052 | 0.111 | **0.719*** |
| 21 | Feelings come and go quickly | 0.008 | 0.124 | -0.174 | **0.624*** |
| 41 | Feels unfairly blamed | -0.161 | 0.241 | -0.066 | **0.520*** |
| *Items not used as factor indicators* | |  |  |  |  |
| 3 | Makes close friends | 0.349* | 0.291* | 0.461* | -0.350* |
| 4 | Blames others | -0.398* | 0.372* | -0.068 | 0.392* |
| 7 | Stays away from scary | 0.424* | -0.312* | -0.106 | 0.144 |
| 11 | Tells lie if he/she can | -0.396* | 0.577* | -0.027 | 0.115 |
| 12 | Easily bored | 0.02 | 0.208 | -0.340* | 0.209 |
| 13 | Shows feelings openly | 0.232 | 0.488* | 0.565* | 0.171 |
| 16 | Takes advantage of others | -0.408* | 0.513* | -0.14 | 0.057 |
| 20 | Mean to others | -0.648* | 0.089 | 0.046 | 0.421* |
| 22 | Uses head before doing or saying | 0.234 | -0.166 | 0.395* | -0.371* |
| 23 | Hard time waiting | -0.002 | 0.359* | -0.215 | 0.579* |
| 28 | Can be trusted | 0.519* | -0.365* | 0.262* | -0.065 |
| 29 | Reliable and dependable | 0.484* | -0.269 | 0.439* | 0.013 |
| 30 | Usually believe his/her lies | 0.223 | 0.338* | -0.055 | -0.103 |
| 31 | Teases and picks on others | -0.531* | 0.161 | 0.218 | 0.446* |
| 38 | Regrets things | 0.832* | -0.053 | -0.022 | 0.608* |
| 43 | Thinks about actions | 0.381* | -0.182 | 0.516* | 0.015 |
| 45 | Takes a lot and does not give | -0.452* | 0.449* | -0.067 | 0.132 |

*Notes*. Items in bold font were used as indicators of factors in subsequent analyses. PE = prosocial-empathy. GM = grandiose-manipulative. AP = attentive-planful. EV = emotionally volatile.

* = *p <* .05

Reference

Tabachnik, B. G., & Fidell, L. S. (2012). *Using multivariate statistics* (6th ed.). NY: Harper-Collins.
